# Supplementary figures and images for: The trajectory of cortical GABA across the lifespan, an individual participant data meta-analysis of edited MRS studies
Source: eLife journal article supplement (doi:10.7554/elife.62575), 2021-06-01

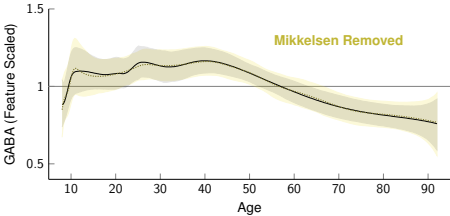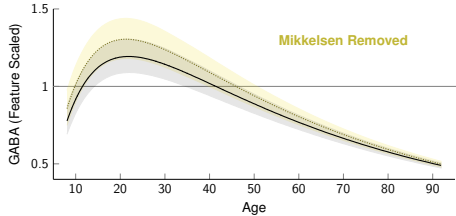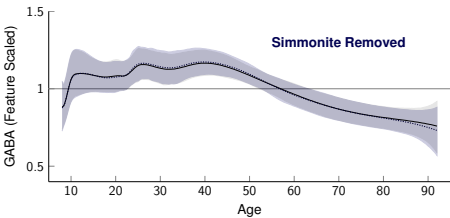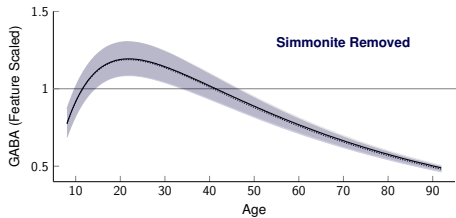

Supplement: supp [file elife-62575-supp-v1.zip]
